# Supplementary material
Source: PubMed Central journal article supplement (PMC3538150)

Figure S1

**A**

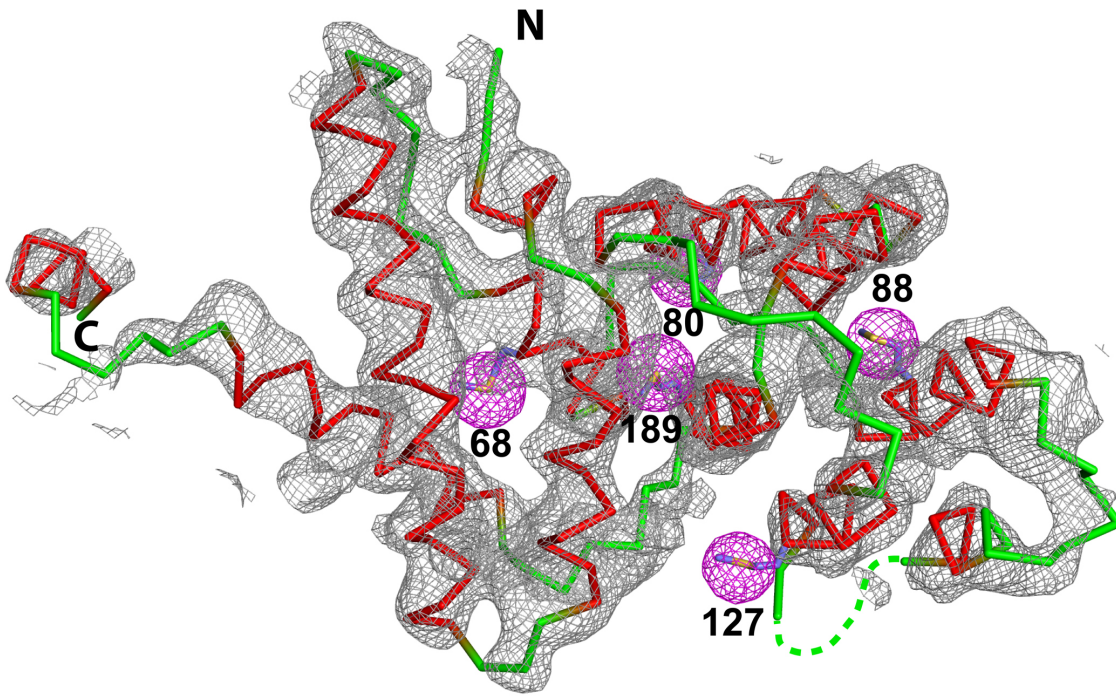

**B**

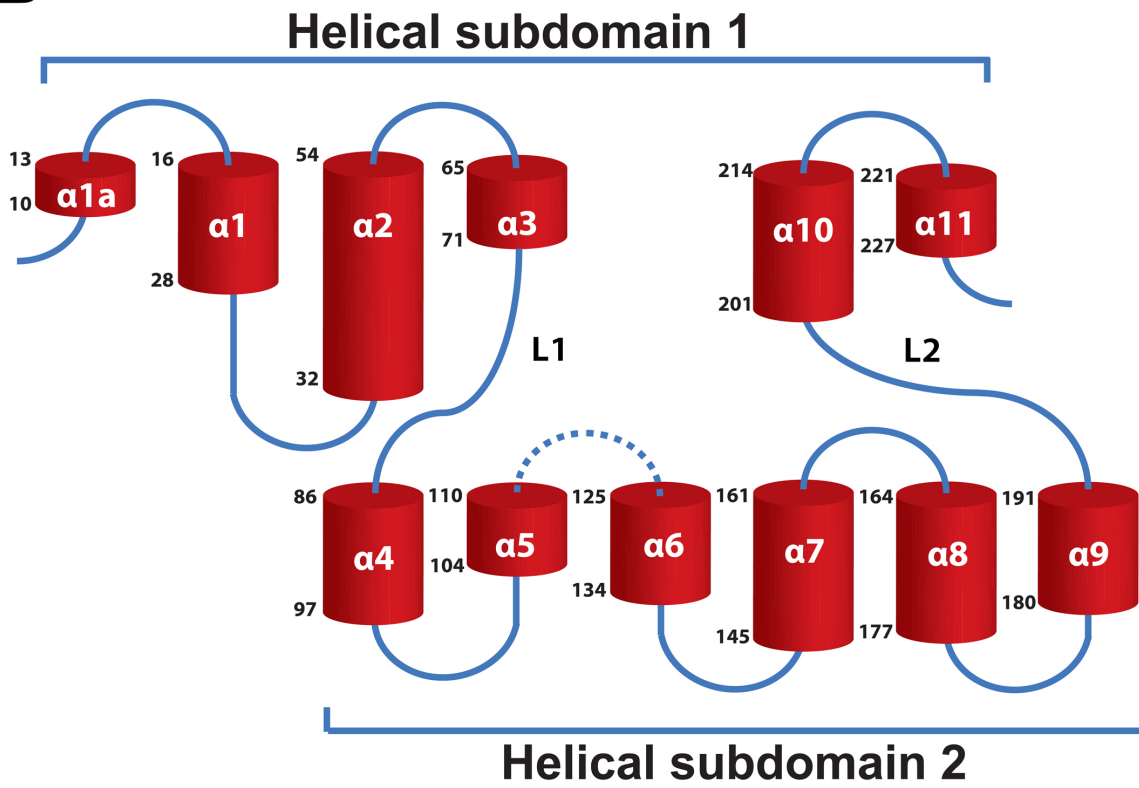

Figure S2

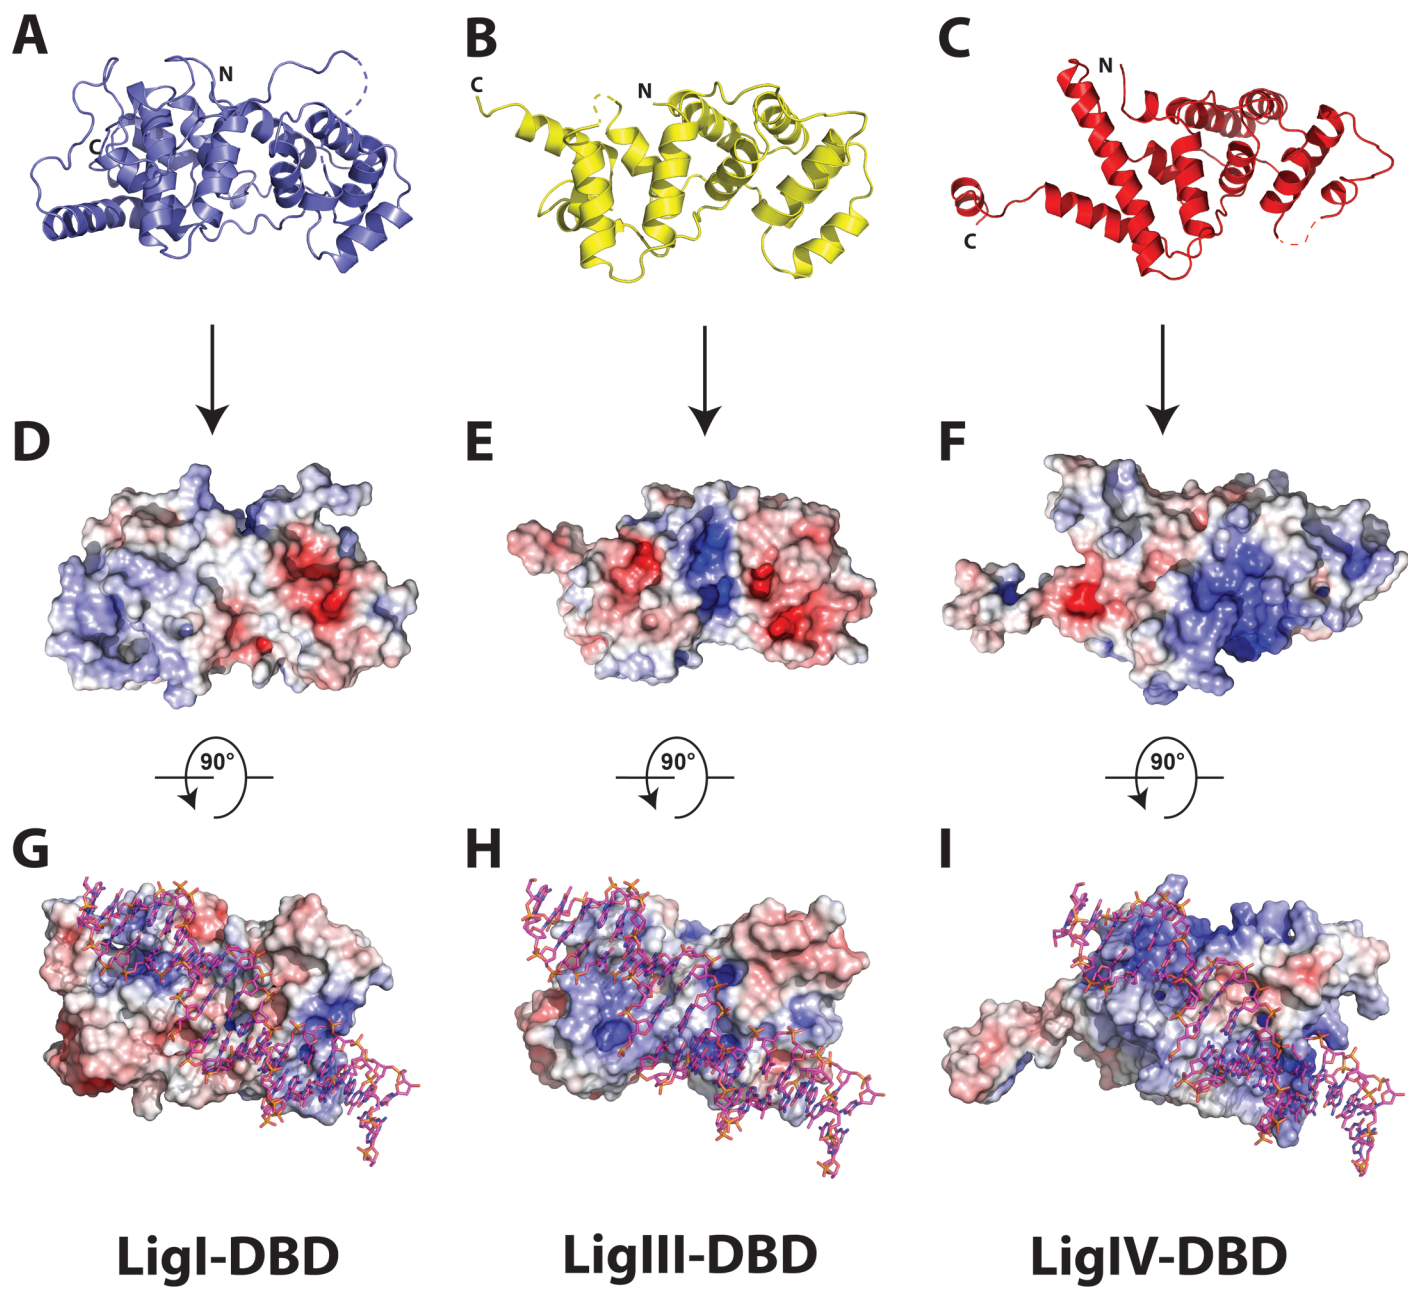



Figure S4

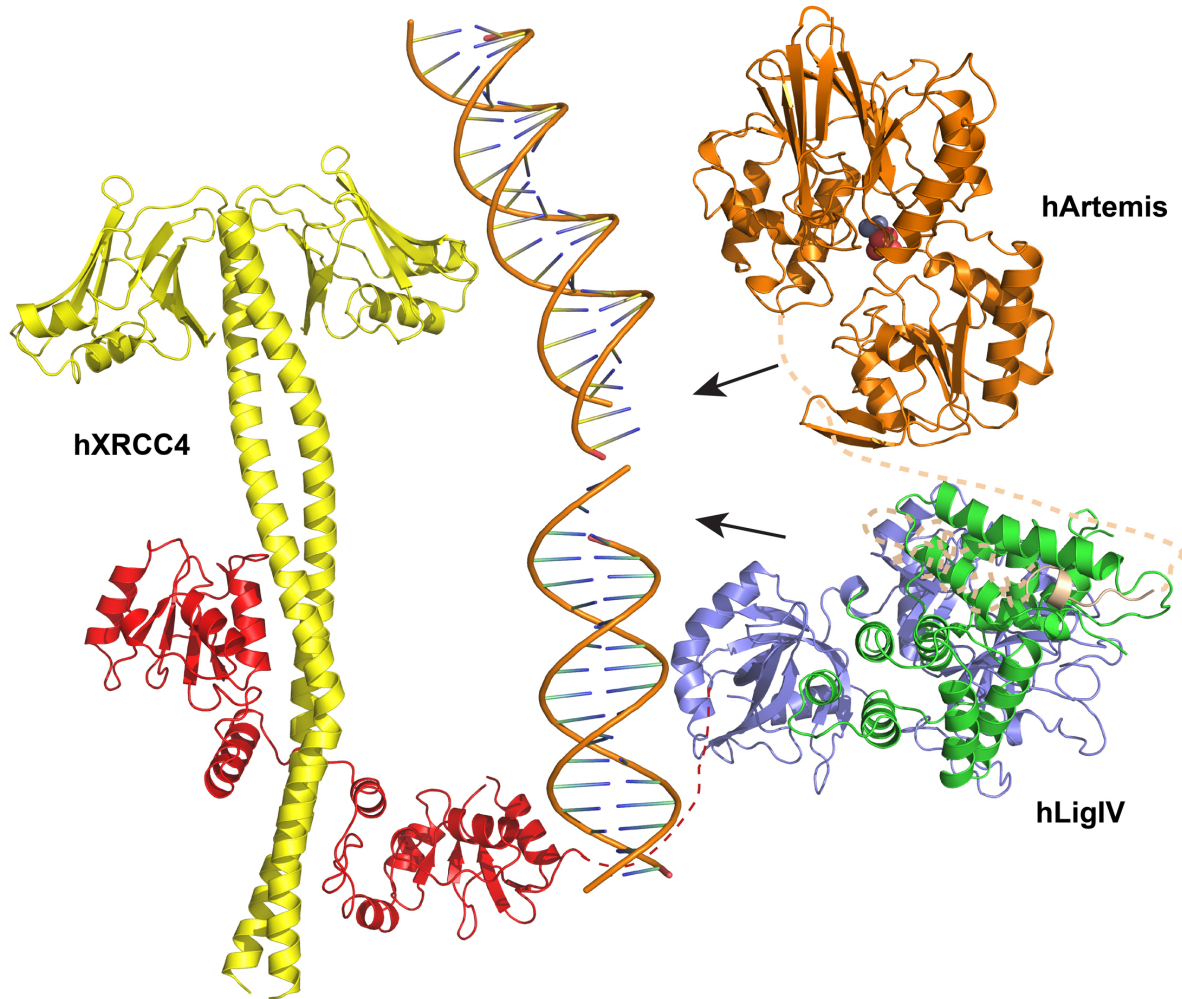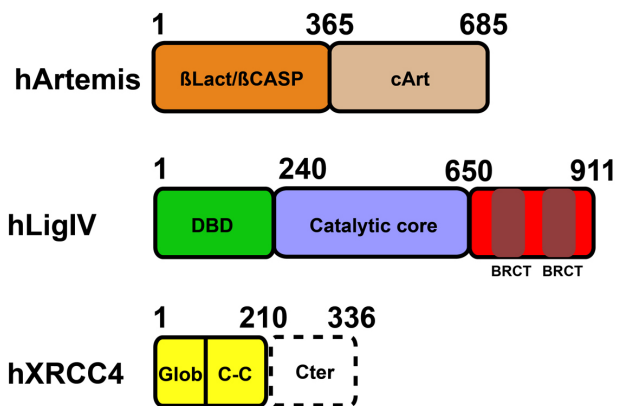

Supplement: NIHMS422334-supplement-02.pdf [file NIHMS422334-supplement-02.pdf]
